# Supplementary material for: Impact of Bacillus cereus on the Human Gut Microbiota in a 3D In Vitro Model
Source: MDPI journal article supplement (doi:10.3390/microorganisms11071826), 2023-07-17
Supplement: s1 [file s1]

Table S1. Primer pairs used for the quantification of total bacterial load and microbial phyla [10].

| Investigated bacterial group | Primer name and sequence (5'-3')                       | Amplicon length (bp) | Annealing temperature (°C) |
|------------------------------|--------------------------------------------------------|----------------------|----------------------------|
| All bacteria                 | F: ACTCCTACGGGAGGCAGCAG<br>R: ATTACCGCGGCTGCTGG        | 200                  | 60                         |
| <i>Firmicutes</i>            | F: ATGTGGTTTAATTCGAAGCA<br>R: AGCTGACGACAACCATGCAC     | 126                  | 62                         |
| <i>Bacteroidetes</i>         | F: CATGTGGTTTAATTCGATGAT<br>R: AGCTGACGACAACCATGCAG    | 126                  | 62                         |
| <i>Actinobacteria</i>        | F: CGCGGCCTATCAGCTTGTTG<br>R: CCGTACTCCCCAGGCGGGG      | 600                  | 67                         |
| <i>Proteobacteria</i>        | F: CATGACGTTACCCGCAGAAGAAG<br>R: CTCTACGAGACTCAAGCTTGC | 195                  | 63                         |

Table S2. Primer pairs used for the quantification of microbial genera [10].

| Investigated bacterial group | Primer name and sequence (5'-3')                           | Amplicon length (bp) | Annealing temperature (°C) |
|------------------------------|------------------------------------------------------------|----------------------|----------------------------|
| <i>Akkermansia</i>           | F: CAGCACGTGAAGGTGGGGAC<br>R: CCTTGCGGTTGGCTTCAGAT         | 329                  | 50                         |
| <i>Bacillus</i>              | F: GCAACGAGCGCAACCCTTGA<br>R: TCATCCCCACCTTCCTCCGGT        | 92                   | 68                         |
| <i>Bacteroides</i>           | F: GAGAGGAAGGTCCCCAC<br>R: CGCTACTTGGCTGGTTCAG             | 106                  | 60                         |
| <i>Bifidobacterium</i>       | F: CTCCTGGAAACGGGTGG<br>R: GGTGTTCTTCCCGATATCTACA          | 550                  | 55                         |
| <i>Clostridium</i>           | F: AAAGGAAGATTAATACCGCATAA<br>R: ATCTTGCGACCGTACTCCCC      | 722                  | 57                         |
| <i>Escherichia-Shigella</i>  | F: GAGTAAAGTTAATACCTTTGCTC<br>R: ACTCAAGCTTGCCAGTATCAG     | 203                  | 52                         |
| <i>Faecalibacterium</i>      | F: GGAGGAAGAAGGTCTTCGG<br>R: AATCCGCCTACCTCTGCACT          | 248                  | 50                         |
| <i>Lactobacillus</i>         | F: GAGGCAGCAGTAGGGAATCTTC<br>R: GCCAGTTACTACCTCTATCCTTCTTC | 126                  | 65                         |
| <i>Prevotella</i>            | F: GGTTCTGAGAGGAAGGTCCCC<br>R: TCCTGCACGCTACTTGGCTG        | 121                  | 60                         |
| <i>Ruminococcus</i>          | F: GGCGGCYTRCTGGGCTTT<br>R: ACCTTCCTCCGTTTTGTCAAC          | 451                  | 63                         |
